# Supplementary material
Source: PubMed Central journal article supplement (PMC3370869)
Supplement: supp_194.12.3241_TableS1_FigS1.pdf [file supp_194.12.3241_TableS1_FigS1.pdf]

|                 | Description                                       | Reference |
|-----------------|---------------------------------------------------|-----------|
| Strains         |                                                   |           |
| WT              | <i>S. marcescens</i> RM66262, clinical isolate    | (7)       |
| <i>wecA</i>     | <i>wecA</i> ::pknock-Cm                           | (8)       |
| <i>wecD</i>     | <i>wecD</i> ::mini-Tn-5Km                         | (7)       |
| <i>wecG</i>     | <i>wecG</i> ::pknock-Cm                           | (8)       |
| <i>rcsA</i>     | <i>rcsA</i> ::pknock-Gm                           | (8)       |
| <i>rcsB</i>     | <i>rcsB</i> ::pknock-Gm                           | (8)       |
| <i>rcsAwecD</i> | <i>rcsA</i> ::pknock-Gm <i>wecD</i> ::mini-Tn-5Km | (8)       |
| <i>rcsBwecD</i> | <i>rcsB</i> ::pknock-Gm <i>wecD</i> ::mini-Tn-5Km | (8)       |
| Plasmids        |                                                   |           |
| <i>pwecG</i>    | pBBr1-MCS5:: <i>wzyEwecG</i>                      | (7)       |

**Table S1: Description of the Strains and Plasmids used in this study.**

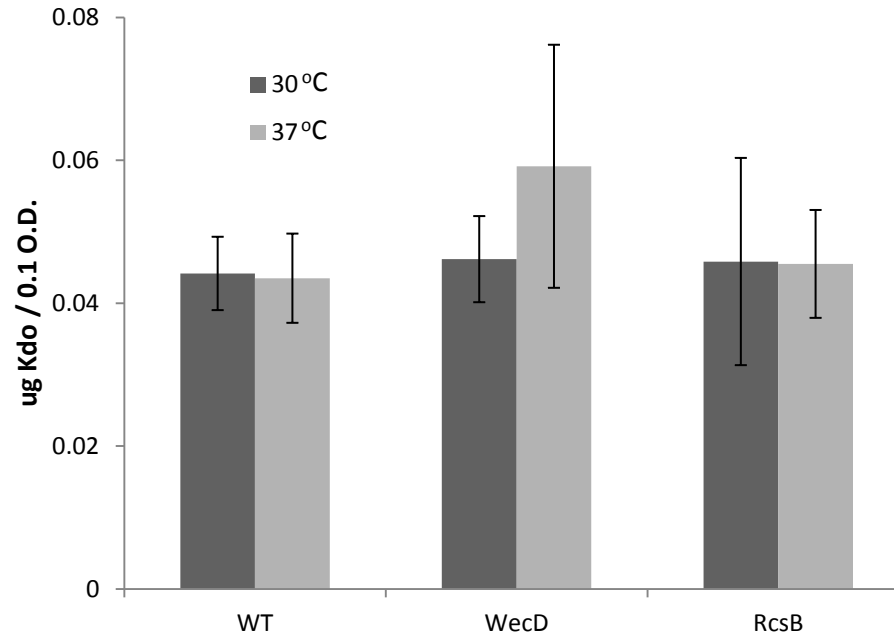

**Fig S1: Modification of Lipid A with KDO does not vary with temperature or in the RcsB / WecD mutants.** The KDO assay was performed on whole cells normalized to 0.1 O.D. Units, with no significant variation in observed levels.
